# Supplementary material for: Relationship between the Dietary Inflammatory Index Score and Cytokine Levels in Chinese Pregnant Women during the Second and Third Trimesters
Source: MDPI journal article supplement (doi:10.3390/nu15010194), 2022-12-30
Supplement: s1 [file s1]

## Supplementary Material

**Table S1** Characteristics and DII scores of participants (n=175) \*

|                                            | <b>Participants<br/>(n=175)</b> |
|--------------------------------------------|---------------------------------|
| <b>Gestational age at delivery (weeks)</b> | 39.43(38.57,40.29)              |
| <b>Sex of fetus</b>                        |                                 |
| Male                                       | 70(40.00%)                      |
| Female                                     | 88(50.29%)                      |
| Missing                                    | 17(9.71%)                       |
| <b>Any complications</b>                   |                                 |
| No                                         | 142(81.14%)                     |
| Yes                                        | 33(18.86%)                      |
| <b>Gravidity</b>                           |                                 |
| 1.00                                       | 115(65.71%)                     |
| 2.00                                       | 43(24.57%)                      |
| 3.00                                       | 17(9.71%)                       |
| <b>Parity</b>                              |                                 |
| 0.00                                       | 135(77.14%)                     |
| 1.00                                       | 39(22.29%)                      |
| 2.00                                       | 1(0.57%)                        |

\*Basic information of 175 pregnant women who participated in the cohort.

**Table S2** Statistical analysis of restricted cubic spline regression between inflammatory parameters and DII scores in pregnant women in the second and third trimesters<sup>#</sup>

|               | <b>T2</b> | <b>T3</b>     |
|---------------|-----------|---------------|
| CRP           | 0.792     | 0.696         |
| IL-1 $\beta$  | 0.148     | <b>0.039*</b> |
| IL-6          | 0.684     | 0.117         |
| IL-8          | 0.104     | 0.306         |
| IL-10         | 0.76      | 0.112         |
| MCP-1         | 0.892     | <b>0.035*</b> |
| TNF- $\alpha$ | 0.159     | 0.690         |

CRP, C-reactive protein; IL-1 $\beta$ , interleukin 1 $\beta$ ; MCP-1, monocyte chemoattractant protein-1; T2, second trimester; T3, third trimester; TNF- $\alpha$ , tumor necrosis factor- $\alpha$ .

<sup>#</sup>*p* values for nonlinear dose-response relationship between DII score and various cytokines.

\* *p* <0.05

**Table S3** Relationship between the change in repeated measurements of the DII and cytokines in pregnant women during the second and third trimesters of pregnancy

|              |                | <b>T3-T2<sup>#</sup></b> | <b><i>p</i></b> |
|--------------|----------------|--------------------------|-----------------|
| <b>CRP</b>   | <b>P35-P65</b> | 0.28±0.07                | ref.            |
|              | <b>&lt;P35</b> | 0.43±0.08                | 0.172           |
|              | <b>≥P65</b>    | 0.45±0.07                | 0.098           |
| <b>IL-10</b> | <b>P35-P65</b> | 0.62±0.12                | ref.            |
|              | <b>&lt;P35</b> | 0.52±0.12                | 0.557           |
|              | <b>≥P65</b>    | <b>0.20*±0.11</b>        | <b>0.011</b>    |
| <b>IL-1β</b> | <b>P35-P65</b> | 0.10±0.13                | ref.            |
|              | <b>&lt;P35</b> | -0.05±0.14               | 0.446           |
|              | <b>≥P65</b>    | 0.05±0.12                | 0.795           |
| <b>IL-6</b>  | <b>P35-P65</b> | 0.16±0.08                | ref.            |
|              | <b>&lt;P35</b> | 0.10±0.09                | 0.617           |
|              | <b>≥P65</b>    | 0.18±0.08                | 0.913           |
| <b>IL-8</b>  | <b>P35-P65</b> | 0.51±0.08                | ref.            |
|              | <b>&lt;P35</b> | 0.49±0.08                | 0.921           |
|              | <b>≥P65</b>    | 0.52±0.07                | 0.899           |
| <b>MCP-1</b> | <b>P35-P65</b> | 1.69±0.10                | ref.            |
|              | <b>&lt;P35</b> | 1.77±0.11                | 0.620           |
|              | <b>≥P65</b>    | 1.77±0.09                | 0.564           |
| <b>TNF-α</b> | <b>P35-P65</b> | 0.64±0.11                | ref.            |
|              | <b>&lt;P35</b> | 0.76±0.11                | 0.406           |
|              | <b>≥P65</b>    | 0.67±0.09                | 0.830           |

CRP, C-reactive protein; IL-1β, interleukin 1β; MCP-1, monocyte chemoattractant protein-1; T2, second trimester; T3, third trimester; TNF-α, serum tumor necrosis factor-α.

<sup>#</sup>T3-T2 for the mean DII difference between third and second trimester.

*p* value for the comparison between the <P35, ≥P65 and P35-P65 groups.

\**p* < 0.017

Table S4 The RNI and intake of major nutrients/food components and generalized linear analysis of nutrients/food components and DII scores

|                  | T2     |                 |        |                            | T3     |                |        |                            |
|------------------|--------|-----------------|--------|----------------------------|--------|----------------|--------|----------------------------|
|                  | RNI^   | Intake          | %\$    | B(95%CI)#                  | RNI^   | Intake         | %\$    | B(95%CI)#                  |
| β-carotenes(μg)  | -      | 1140.76±1496.90 | -      | <b>0.00*(0.00,0.00)</b>    | -      | 945.47±895.81  | -      | <b>0.00*(0.00,0.00)</b>    |
| SFAs(g)          | -      | 17.93±10.26     | -      | 0.00(-0.02,0.02)           | -      | 16.11±6.78     | -      | 0.02(-0.02,0.07)           |
| MUFAs(g)         | -      | 18.50±11.90     | -      | 0.00(-0.02,0.02)           | -      | 15.31±8.73     | -      | -0.02(-0.06,0.02)          |
| PUFAs(g)         | -      | 13.09±12.96     | -      | 0.00(-0.01,0.01)           | -      | 8.62±6.47      | -      | 0.01(-0.02,0.03)           |
| Protein(g)       | 70.00  | 74.06±31.07     | 105.80 | 0.00(-0.01,0.01)           | 85.00  | 73.73±21.61    | 86.75  | 0.01(0.00,0.02)            |
| Total fat(g)     | -      | 48.18±25.96     | -      | <b>0.01*(0.00,0.02)</b>    | -      | 46.62±20.53    | -      | 0.01(0.00,0.02)            |
| Carbohydrates(g) | -      | 231.76±98.79    | -      | 0.00(0.00,0.00)            | -      | 233.53±73.66   | -      | 0.00(0.00,0.00)            |
| Fiber (g)        | -      | 11.97±6.94      | -      | <b>-0.05*(-0.07,-0.02)</b> | -      | 11.24±5.67     | -      | <b>-0.06*(-0.08,-0.03)</b> |
| Cholesterol(mg)  | -      | 448.54±261.64   | -      | 0.00(0.00,0.00)            | -      | 465.76±224.11  | -      | 0.00(0.00,0.00)            |
| Vitamin A (RE)   | 770.00 | 1256.32±998.72  | 163.16 | 0.00(0.00,0.00)            | 770.00 | 1124.39±660.93 | 146.03 | 0.00(0.00,0.00)            |
| Vitamin D (μg)   | 10.00  | 12.10±10.64     | 121.02 | <b>-0.01*(-0.02,0.00)</b>  | 10.00  | 10.67±6.61     | 106.71 | <b>-0.05*(-0.07,-0.03)</b> |
| Vitamin E (mg)   | -      | 25.81±13.28     | -      | <b>-0.03*(-0.04,-0.02)</b> | -      | 24.95±10.60    | -      | <b>-0.03*(-0.05,-0.01)</b> |
| Thiamin(mg)      | 1.40   | 1.92±0.83       | 137.05 | 0.17(-0.20,0.54)           | 1.50   | 1.85±0.83      | 123.39 | -0.40(-0.92,0.13)          |
| Riboflavin(mg)   | 1.40   | 2.29±1.20       | 163.59 | -0.03(-0.16,0.10)          | 1.50   | 2.15±1.02      | 143.50 | <b>0.34*(0.06,0.62)</b>    |
| Vitamin B6(mg)   | 2.20   | 1.89±1.23       | 85.82  | <b>-1.31*(-1.99,-0.62)</b> | 2.20   | 1.88±1.27      | 85.68  | <b>-1.47*(-2.11,-0.83)</b> |
| Vitamin B12(μg)  | 2.90   | 2.63±1.90       | 90.81  | <b>0.58*(0.15,1.00)</b>    | 2.90   | 2.60±1.93      | 89.80  | <b>0.88*(0.41,1.36)</b>    |
| Vitamin C(mg)    | 115.00 | 144.94±89.39    | 126.03 | <b>0.00*(-0.01,0.00)</b>   | 115.00 | 139.54±92.72   | 121.33 | 0.00(0.00,0.00)            |
| Folic acid(μg)   | 600.00 | 396.98±189.07   | 66.16  | 0.00(0.00,0.00)            | 600.00 | 333.99±233.61  | 55.67  | <b>0.00*(0.00,0.00)</b>    |
| Niacin(mg)       | 12.00  | 14.88±7.02      | 124.02 | <b>-0.04*(-0.07,-0.01)</b> | 12.00  | 14.14±5.60     | 117.81 | 0.00(-0.03,0.03)           |

|        |        |               |        |                           |        |               |        |                           |
|--------|--------|---------------|--------|---------------------------|--------|---------------|--------|---------------------------|
| Mg(mg) | 370.00 | 344.45±130.23 | 93.10  | <b>0.00*(-0.01,0.00)</b>  | 370.00 | 338.06±110.12 | 91.37  | <b>0.00*(-0.01,0.00)</b>  |
| Fe(mg) | 24.00  | 51.29±30.56   | 213.70 | <b>-0.01*(-0.02,0.00)</b> | 29.00  | 51.11±30.75   | 176.23 | 0.00(-0.01,0.01)          |
| Zn(mg) | 9.50   | 13.50±5.66    | 142.12 | <b>0.07*(0.03,0.11)</b>   | 9.50   | 13.83±4.92    | 145.58 | -0.03(-0.10,0.03)         |
| Se(μg) | 65.00  | 54.02±28.27   | 83.11  | 0.00(-0.01,0.00)          | 65.00  | 54.14±19.64   | 83.29  | <b>-0.01*(-0.02,0.00)</b> |

CRP, C-reactive protein; Fe, iron; IL-1 $\beta$ , interleukin 1 $\beta$ ; MCP-1, monocyte chemoattractant protein-1; Mg, magnesium ; MUFAs, monounsaturated fatty acids; PUFAs, polyunsaturated fatty acids; Se, selenium ;SFAs, saturated fatty acids; T2, second trimester; T3, third trimester; TNF- $\alpha$ , tumor necrosis factor- $\alpha$ ; Zn, zinc.

^ RNI for WS/T 578.1—2017, Chinese dietary reference intake—Part 1: Macronutrients; WS/T 578.2—2018, Chinese dietary reference intake—Part 2: Macroelements; WS/T 578.3—2017, Chinese dietary reference intake—Part 3: Trace elements; WS/T 578.4—2018, Chinese dietary reference intake—Part 4: Lipid-soluble vitamins; WS/T 578.5—2018, Chinese dietary reference intake—Part 5: Water-soluble vitamins

<sup>s</sup>% for intake divided by RNI and multiplied by 100

<sup>#</sup> Coefficient generalized linear model analysis of the effects of major nutrients/food ingredients on DII.

\*  $p < 0.05$
